# Supplementary material for: Structural Connectivity Alterations in Operculo-Insular Epilepsy
Source: MDPI journal article supplement (doi:10.3390/brainsci11081041), 2021-08-05
Supplement: s1 [file s1]

## Supplementary Material

### Supplementary Figures

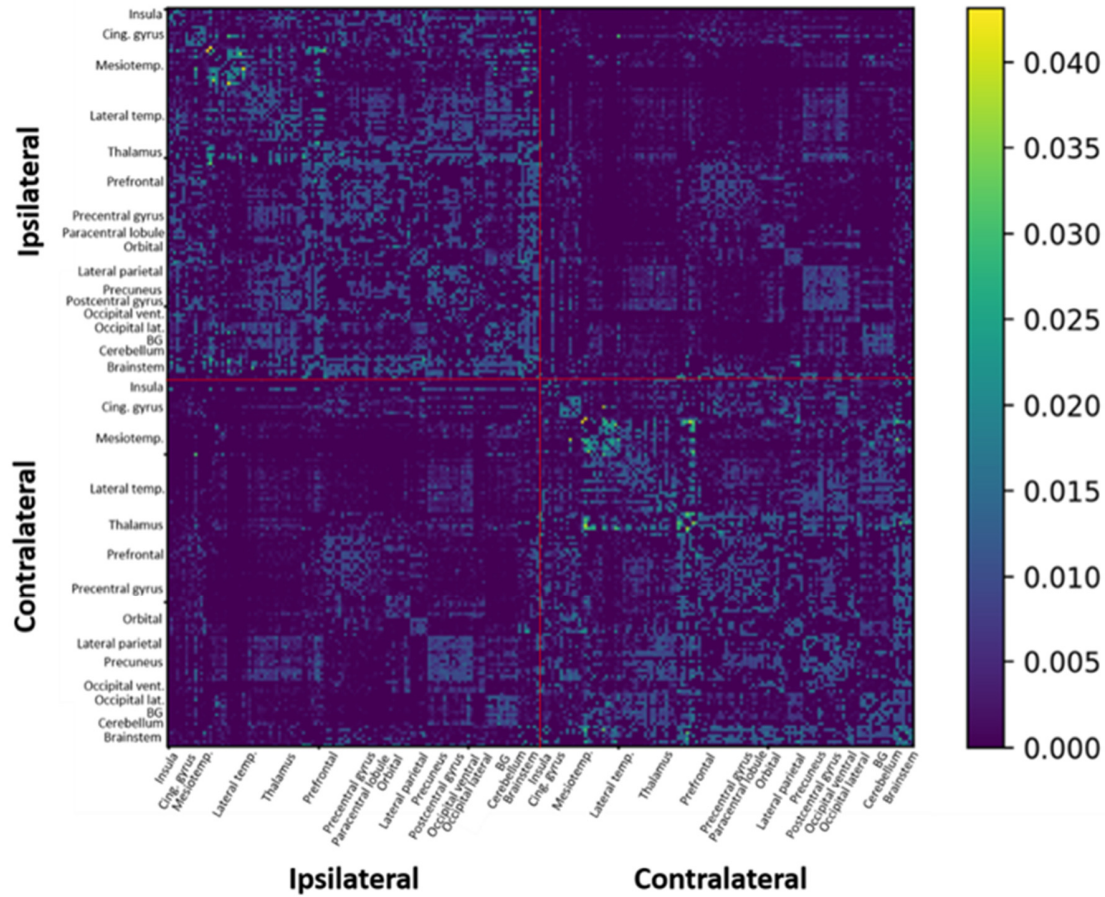

**Figure S1.** Average whole-brain COMMIT-weighted connectivity matrix in the OIE group. The matrix was masked based on a similarity threshold calculated in HCs. The colour bar corresponds to the measured COMMIT weight.

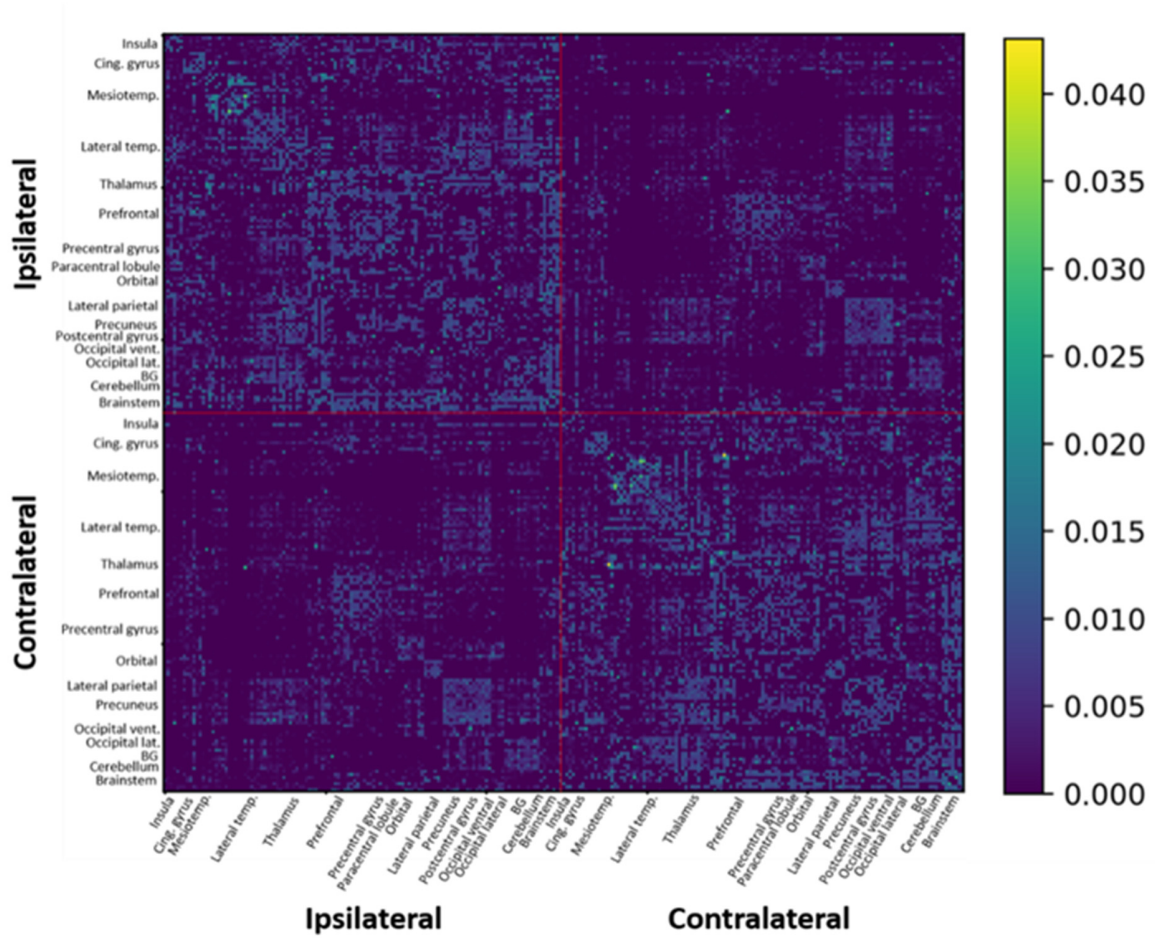

**Figure S2.** Average whole-brain COMMIT-weighted connectivity matrix in the TLE group. The matrix was masked based on a similarity threshold calculated in HCs. The colour bar corresponds to the measured COMMIT weight.

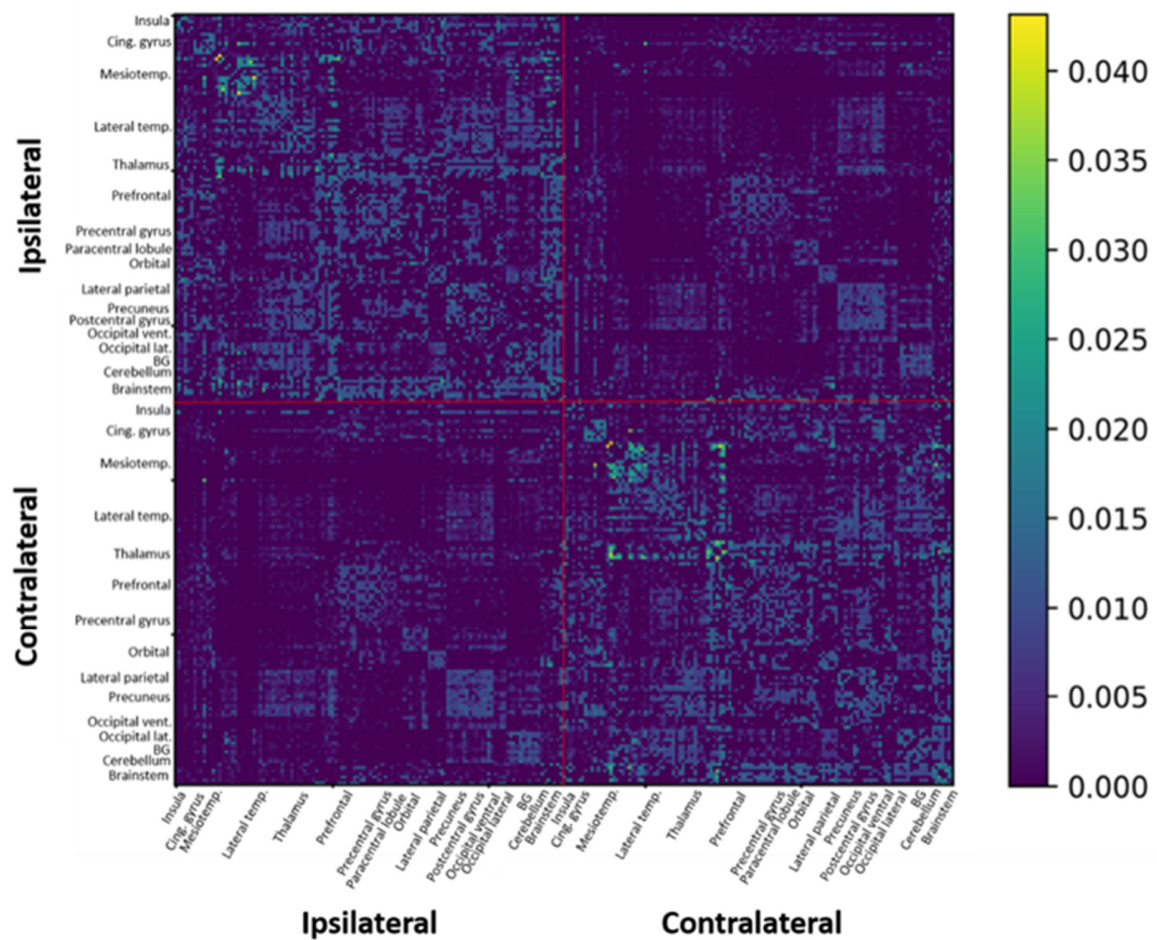

**Figure S3.** Average whole-brain COMMIT-weighted connectivity matrix in the HC group. The matrix was masked based on a similarity threshold calculated in HCs. The colour bar corresponds to the measured COMMIT weight.

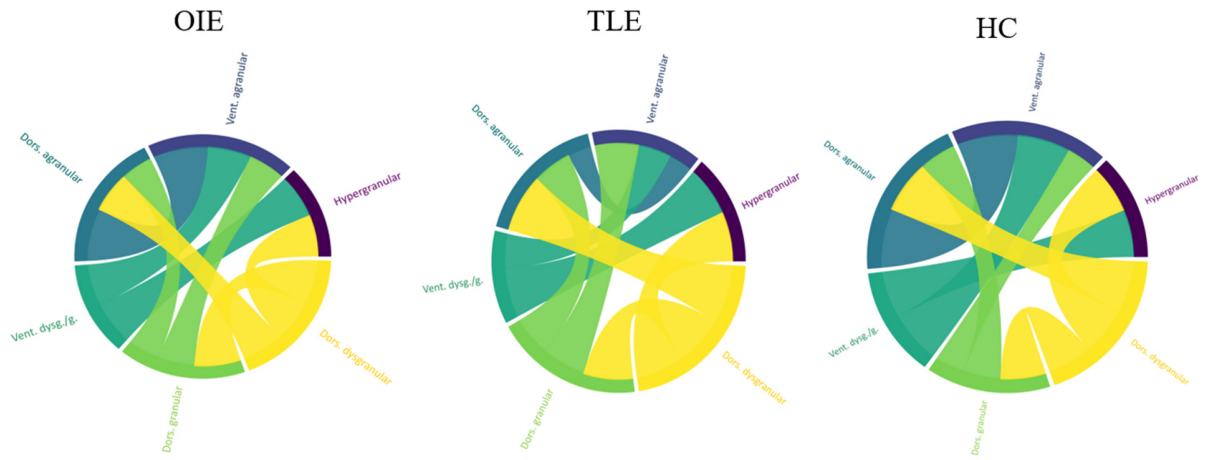

**Figure S4.** Average COMMIT-weighted connectome rings of the insular subnetwork in OIE, TLE and HC participants. The submatrix was masked based on a similarity threshold calculated from the insular submatrices of HCs. The width of the colored connections is proportional to the COMMIT weight of the connection. Vent.= ventral; Dors.= dorsal; dysg./g. = dysgranular/granular.

## Supplementary Tables

| Reduced connectivity in patients with OIE                   |   |                                                                 |
|-------------------------------------------------------------|---|-----------------------------------------------------------------|
| Ipsilateral orbital gyrus                                   | - | Ipsilateral lateral occipital cortex (V5_MT)                    |
| Ipsilateral rostral MTG                                     | - | Ipsilateral dorsal granular insula                              |
| Ipsilateral ITG (intermediate)                              | - | Ipsilateral globus pallidus                                     |
| Ipsilateral frontal operculum                               | - | Ipsilateral rostral hippocampus                                 |
| Contralateral caudodorsal cingulate gyrus                   | - | Contralateral ventral cingulate gyrus                           |
| Contralateral medial prefrontal thalamus                    | - | Brainstem                                                       |
| Increased connectivity in patients with OIE                 |   |                                                                 |
| Ipsilateral rostradorsal IPL                                | - | Ipsilateral lateral posterior PHG                               |
| Ipsilateral precuneus (medial area 7)                       | - | Ipsilateral rostral PHG                                         |
| Ipsilateral precuneus (medial area 5)                       | - | Brainstem                                                       |
| Ipsilateral dorsomedial parieto-occipital sulcus            | - | Ipsilateral pregenual cingulate gyrus                           |
| Ipsilateral postcentral (area2)                             | - | Ipsilateral ventromedial putamen                                |
| Ipsilateral dorsal granular insula                          | - | Ipsilateral pregenual cingulate gyrus                           |
| Ipsilateral lateral prefrontal thalamus                     | - | Ipsilateral MFG (inferior frontal junction)                     |
| Ipsilateral lateral prefrontal thalamus                     | - | Ipsilateral rostral lingual gyrus                               |
| Ipsilateral ventrolateral caudal precentral gyrus           | - | Contralateral posterior parietal thalamus                       |
| Ipsilateral rostroposterior superior temporal sulcus        | - | Contralateral rostroventral IPL                                 |
| Ipsilateral precuneus (medial area 7)                       | - | Contralateral rostroposterior superior temporal sulcus          |
| Ipsilateral dorsal agranular insula                         | - | Contralateral dorsolateral putamen                              |
| Ipsilateral sensory thalamus                                | - | Contralateral ITG (intermediate lateral area)                   |
| Contralateral lateral occipital cortex (polar cortex)       | - | Contralateral postcentral gyrus (trunk region)                  |
| Contralateral lateral occipital cortex (polar cortex)       | - | Contralateral dorsal cingulate gyrus                            |
| Contralateral lateral occipital (inferior occipital cortex) | - | Contralateral lateral occipital cortex (middle occipital gyrus) |

**Table S1.** Links showing changes in COMMIT weights in OIE patients compared to HCs. Comparisons were performed using general linear models. Significance was thresholded at  $p < 0.001$  uncorrected. MTG = middle temporal gyrus; ITG=inferior temporal gyrus; IPL = inferior parietal lobule; PHG= parahippocampal gyrus.

| Increased connectivity in patients with OIE          |   |                                                                           |
|------------------------------------------------------|---|---------------------------------------------------------------------------|
| Ipsilateral rostral PHG                              | - | Ipsilateral precuneus (medial area 7)                                     |
| Ipsilateral rostrocaudal IPL                         | - | Ipsilateral caudodorsal cingulate gyrus                                   |
| Ipsilateral lateral amygdala                         | - | Ipsilateral rostradorsal IPL                                              |
| Ipsilateral premotor thalamus                        | - | Ipsilateral inferior frontal sulcus                                       |
| Ipsilateral rostral temporal thalamus                | - | Ipsilateral lateral occipital cortex (inferior occipital cortex)          |
| Ipsilateral caudal SPL                               | - | Contralateral caudal temporal thalamus                                    |
| Brainstem                                            | - | Contralateral occipital thalamus                                          |
| Contralateral precentral gyrus (caudal dorsolateral) | - | Contralateral caudal temporal thalamus                                    |
| Contralateral rostroventral fusiform gyrus           | - | Contralateral lateral occipital cortex (middle occipital gyrus)           |
| Contralateral lateral posterior PHG                  | - | Contralateral rostradorsal IPL                                            |
| Contralateral lateral occipital cortex (V5_MT)       | - | Contralateral precentral gyrus (tongue and larynx regions)                |
| Contralateral ventromedial putamen                   | - | Contralateral lateral SPL                                                 |
| Contralateral occipital thalamus                     | - | Contralateral lateroventral fusiform gyrus                                |
| Contralateral temporal thalamus                      | - | Contralateral lateral occipital cortex (V5_MT)                            |
| Increased connectivity in patients with TLE          |   |                                                                           |
| Ipsilateral medial prefrontal thalamus               | - | Ipsilateral caudal medioventral occipital cortex                          |
| Ipsilateral rostral temporal thalamus                | - | Ipsilateral rostral hippocampus                                           |
| Ipsilateral medial STG                               | - | Contralateral rostral hippocampus                                         |
| Ipsilateral precuneus (dorsomedial p-o sulcus)       | - | Contralateral rostoposterior superior temporal sulcus                     |
| Ipsilateral medial prefrontal thalamus               | - | Contralateral medial orbital                                              |
| Contralateral caudal STG                             | - | Contralateral lateral occipital cortex (lateral superior occipital gyrus) |
| Contralateral dorsolateral MTG                       | - | Contralateral ventral agranular insula                                    |

**Table S2.** Links showing changes in COMMIT weights when comparing OIE to TLE patients. Comparisons were performed using general linear models. Significance was thresholded at  $p < 0.001$  uncorrected. PHG = parahippocampal gyrus; IPL = inferior parietal lobule; SPL = superior parietal lobule; p-o = parieto-occipital; STG = superior temporal gyrus; p-o = parieto-occipital; MTG = middle temporal gyrus.

| Increased degree in patients with OIE           | Increased degree in patients with TLE        |
|-------------------------------------------------|----------------------------------------------|
| Ipsilateral lateral orbital gyrus               | Ipsilateral dorsal IFG                       |
| Ipsilateral paracentral lobule                  | Ipsilateral rostral IFG                      |
| Ipsilateral medioventral fusiform gyrus         | Ipsilateral precuneus (area 3)               |
| Ipsilateral caudal PHG                          | Ipsilateral lateral occipital cortex (V5_MT) |
| Ipsilateral posterior PHG                       | Ipsilateral lateral superior occipital gyrus |
| Ipsilateral postcentral gyrus (area 2)          | Ipsilateral medial prefrontal thalamus       |
| Ipsilateral hypergranular insula                | Contralateral medial SFG                     |
| Ipsilateral ventral agranular insula            | Contralateral dorsal MFG                     |
| Ipsilateral dorsal agranular insula             | Contralateral caudal SPL                     |
| Ipsilateral ventral dysgranular/granular insula | Contralateral caudal IPL                     |
| Ipsilateral dorsal granular insula              | Contralateral caudal cingulate gyrus         |
| Ipsilateral dorsal dysgranular insula           | Contralateral caudal lingual gyrus           |
| Ipsilateral rostroventral cingulate gyrus       | Contralateral caudal cuneus                  |
| Ipsilateral caudal cingulate gyrus              | Contralateral occipital polar cortex         |
| Ipsilateral caudal lingual gyrus                | Contralateral inferior occipital cortex      |
| Ipsilateral rostral lingual gyrus               | Contralateral caudal hippocampus             |
| Ipsilateral occipital polar cortex              | Contralateral dorsal caudate nucleus         |
| Ipsilateral caudal hippocampus                  | Contralateral sensory thalamus               |
| Ipsilateral sensory thalamus                    | Contralateral rostral temporal thalamus      |
| Contralateral lateral orbital gyrus             | Contralateral caudal temporal thalamus       |
| Contralateral rostroventral fusiform            |                                              |
| Contralateral medioventral fusiform             |                                              |
| Contralateral postcentral gyrus (trunk region)  |                                              |
| Contralateral caudal cuneus                     |                                              |
| Contralateral lateral occipital cortex (V5_MT)  |                                              |
| Contralateral inferior occipital cortex         |                                              |
| Contralateral lateral superior occipital gyrus  |                                              |
| Contralateral dorsal caudate nucleus            |                                              |
| Contralateral medial prefrontal thalamus        |                                              |
| Contralateral sensory thalamus                  |                                              |
| Contralateral rostral temporal thalamus         |                                              |
| Contralateral caudal temporal thalamus          |                                              |

**Table S3.** Changes in nodal degrees when comparing OIE to TLE patients. Comparisons were performed using two-tailed t-tests. Significance was thresholded at  $p < 0.05$  uncorrected. PHG = parahippocampal gyrus; IFG = inferior frontal gyrus; SFG = superior frontal gyrus; MFG = middle frontal gyrus; SPL = superior parietal lobule; IPL = inferior parietal lobule.

| Increased betweenness centrality in patients with OIE             | Increased betweenness centrality in patients with TLE |
|-------------------------------------------------------------------|-------------------------------------------------------|
| Ipsilateral lateral orbital gyrus                                 | Ipsilateral lateral superior occipital gyrus          |
| Ipsilateral precentral gyrus (trunk region)                       | Ipsilateral medial prefrontal thalamus                |
| Ipsilateral paracentral lobule                                    | Ipsilateral dorsal IFG                                |
| Ipsilateral lateral posterior PHG                                 | Contralateral caudal lingual gyrus                    |
| Ipsilateral postcentral gyrus (upper limb, head and face regions) | Contralateral caudal cuneus                           |
| Ipsilateral postcentral gyrus (area 2)                            | Contralateral occipital polar cortex                  |
| Ipsilateral hypergranular insula                                  | Contralateral caudal hippocampus                      |
| Ipsilateral ventral agranular insula                              | Contralateral dorsal caudate nucleus                  |
| Ipsilateral dorsal agranular insula                               | Contralateral caudal IPL                              |
| Ipsilateral dorsal dysgranular insula                             |                                                       |
| Ipsilateral rostroventral cingulate gyrus                         |                                                       |
| Ipsilateral cerebellum                                            |                                                       |
| Contralateral lateral orbital gyrus                               |                                                       |
| Contralateral rostroventral fusiform gyrus                        |                                                       |
| Contralateral medioventral fusiform gyrus                         |                                                       |
| Contralateral lateroventral fusiform gyrus                        |                                                       |
| Contralateral rostradorsal IPL                                    |                                                       |
| Contralateral postcentral gyrus (trunk region)                    |                                                       |
| Contralateral caudodorsal cingulate gyrus                         |                                                       |

**Table S4.** Changes in the nodal betweenness centrality when comparing OIE to TLE patients. Comparisons were performed using two-tailed t-tests. Significance was thresholded at  $p < 0.05$  uncorrected. PHG = parahippocampal gyrus; IPL = inferior parietal lobule; IFG = inferior frontal gyrus.

| Increased clustering in patients with OIE        | Increased clustering in patients with TLE       |
|--------------------------------------------------|-------------------------------------------------|
| Ipsilateral dorsal IFG                           | Ipsilateral medioventral fusiform gyrus         |
| Ipsilateral rostral IFG                          | Ipsilateral lateroventral fusiform gyrus        |
| Ipsilateral medial orbital gyrus                 | Ipsilateral lateral posterior PHG               |
| Ipsilateral caudal dorsolateral precentral gyrus | Ipsilateral rostradorsal IPL                    |
| Ipsilateral precentral gyrus (upper limb region) | Ipsilateral ventral cingulate gyrus             |
| Ipsilateral caudolateral ITG                     | Contralateral orbital area of the orbital gyrus |
| Ipsilateral rostroventral IPL                    | Contralateral lateral orbital gyrus             |
| Ipsilateral lateral superior occipital gyrus     | Contralateral caudal MTG                        |
| Ipsilateral dorsolateral putamen                 | Contralateral rostroventral fusiform gyrus      |
| Ipsilateral medial prefrontal thalamus           | Contralateral medioventral fusiform gyrus       |
| Ipsilateral sensory thalamus                     | Contralateral lateroventral fusiform gyrus      |
| Ipsilateral posterior parietal thalamus          | Contralateral rostradorsal IPL                  |
| Contralateral lateral SFG                        | Contralateral ventromedial putamen              |
| Contralateral frontal operculum                  |                                                 |
| Contralateral caudal IPL                         |                                                 |
| Contralateral pregenual cingulate gyrus          |                                                 |
| Contralateral caudal lingual gyrus               |                                                 |
| Contralateral dorsal caudate nucleus             |                                                 |
| Contralateral rostral temporal thalamus          |                                                 |

**Table S5.** Changes in regional clustering coefficients when comparing OIE to TLE patients. Comparisons were performed using two-tailed t-tests. Significance was thresholded at  $p < 0.05$  uncorrected. IFG = inferior frontal gyrus; ITG = inferior temporal gyrus; IPL= inferior parietal lobule; SFG= superior frontal gyrus; PHG = parahippocampal gyrus; MTG = middle temporal gyrus.

| Increased local efficiency in patients with OIE  | Increased local efficiency in patients with TLE |
|--------------------------------------------------|-------------------------------------------------|
| Ipsilateral dorsal IFG                           | Ipsilateral dorsolateral MTG                    |
| Ipsilateral medial orbital gyrus                 | Ipsilateral medioventral fusiform gyrus         |
| Ipsilateral caudal dorsolateral precentral gyrus | Ipsilateral lateral posterior PHG               |
| Ipsilateral precentral gyrus (upper limb region) | Ipsilateral rostradorsal IPL                    |
| Ipsilateral caudolateral ITG                     | Ipsilateral ventral cingulate gyrus             |
| Ipsilateral dorsolateral putamen                 | Contralateral frontal operculum                 |
| Ipsilateral medial prefrontal thalamus           | Contralateral orbital area of the orbital gyrus |
| Contralateral caudal IPL                         | Contralateral lateral orbital gyrus             |
| Contralateral caudal lingual gyrus               | Contralateral caudal MTG                        |
| Contralateral ventromedial putamen               | Contralateral rostroventral fusiform gyrus      |
| Contralateral dorsal caudate nucleus             | Contralateral medioventral fusiform gyrus       |
| Contralateral rostral temporal thalamus          | Contralateral lateroventral fusiform gyrus      |
|                                                  | Contralateral lateral posterior PHG             |
|                                                  | Contralateral pregenual cingulate gyrus         |

**Table S6.** Changes in the regional local efficiency when comparing OIE to TLE patients. Comparisons were performed using two-tailed t-tests. Significance was thresholded at  $p < 0.05$  uncorrected. IFG = inferior frontal gyrus; ITG = inferior temporal gyrus; IPL = inferior parietal lobule; MTG = middle temporal gyrus; PHG = parahippocampal gyrus.

## CODE REPOSITORIES

Tractoflow version 2.2.0 (<https://github.com/scilus/tractoflow/tree/2.2.0>)

SCILPY library version 1.0.0 (<https://github.com/scilus/scilpy/tree/1.0.0>)

Surface-enhanced tractography version 1.1 (<https://github.com/StongeEtienne/set nf/tree/v1.1.a>)
